# Supplementary material for: The influence of polar (0001) zinc oxide (ZnO) on the structure and morphology of vanadyl phthalocyanine (VOPc)
Source: Royal Society of Chemistry journal article supplement (doi:10.1039/c5ra10131j), 2015-01-01
Supplement: c5ra10131j1.pdf [file c5ra10131j1.pdf]

## **Supplementary Information**

### The influence of polar (0001) zinc oxide (ZnO) on the structure and morphology of vanadyl phthalocyanine (VOPc)

Alexandra J. Ramadan\*<sup>†</sup>, Luke A. Rochford<sup>‡</sup>, Mary P. Ryan<sup>†</sup>, Tim S. Jones<sup>‡</sup> and Sandrine Heutz\*<sup>†</sup>

<sup>†</sup>A. J. Ramadan, Prof. M. P. Ryan, Dr. S. Heutz

Department of Materials, Imperial College London, Exhibition Road, London, SW7 2AZ, United Kingdom

<sup>‡</sup>Dr. L. A. Rochford and Prof. T. S. Jones,

Department of Chemistry, University of Warwick, Gibbet Hill Road, Coventry, CV4 7AL, United Kingdom

Corresponding author: [ar707@ic.ac.uk](mailto:ar707@ic.ac.uk), [s.heutz@ic.ac.uk](mailto:s.heutz@ic.ac.uk)

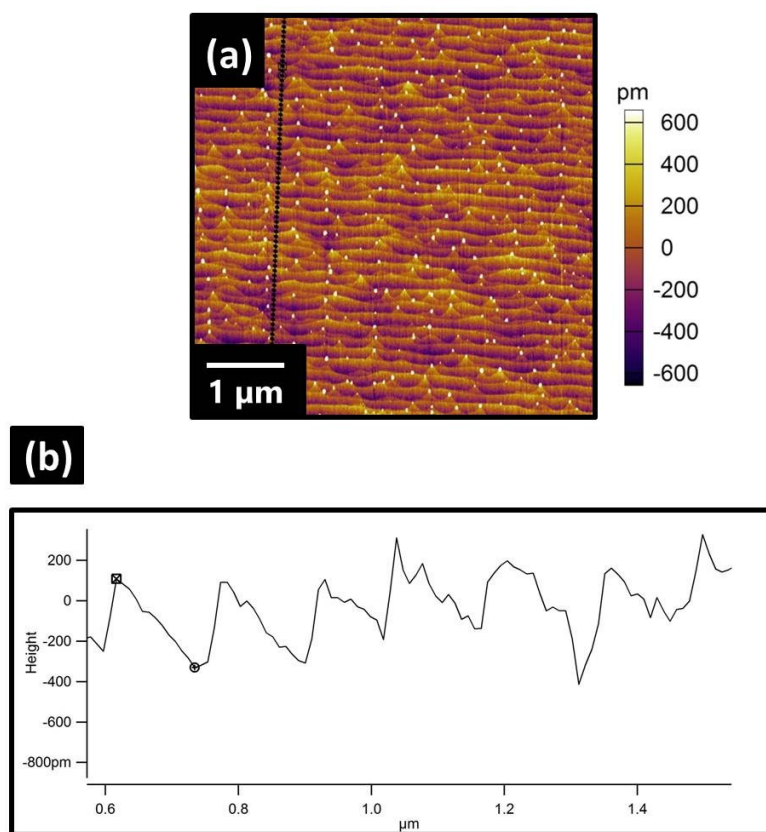

Figure S1 - (a) AFM topography image and (b) corresponding cross-section height profile.

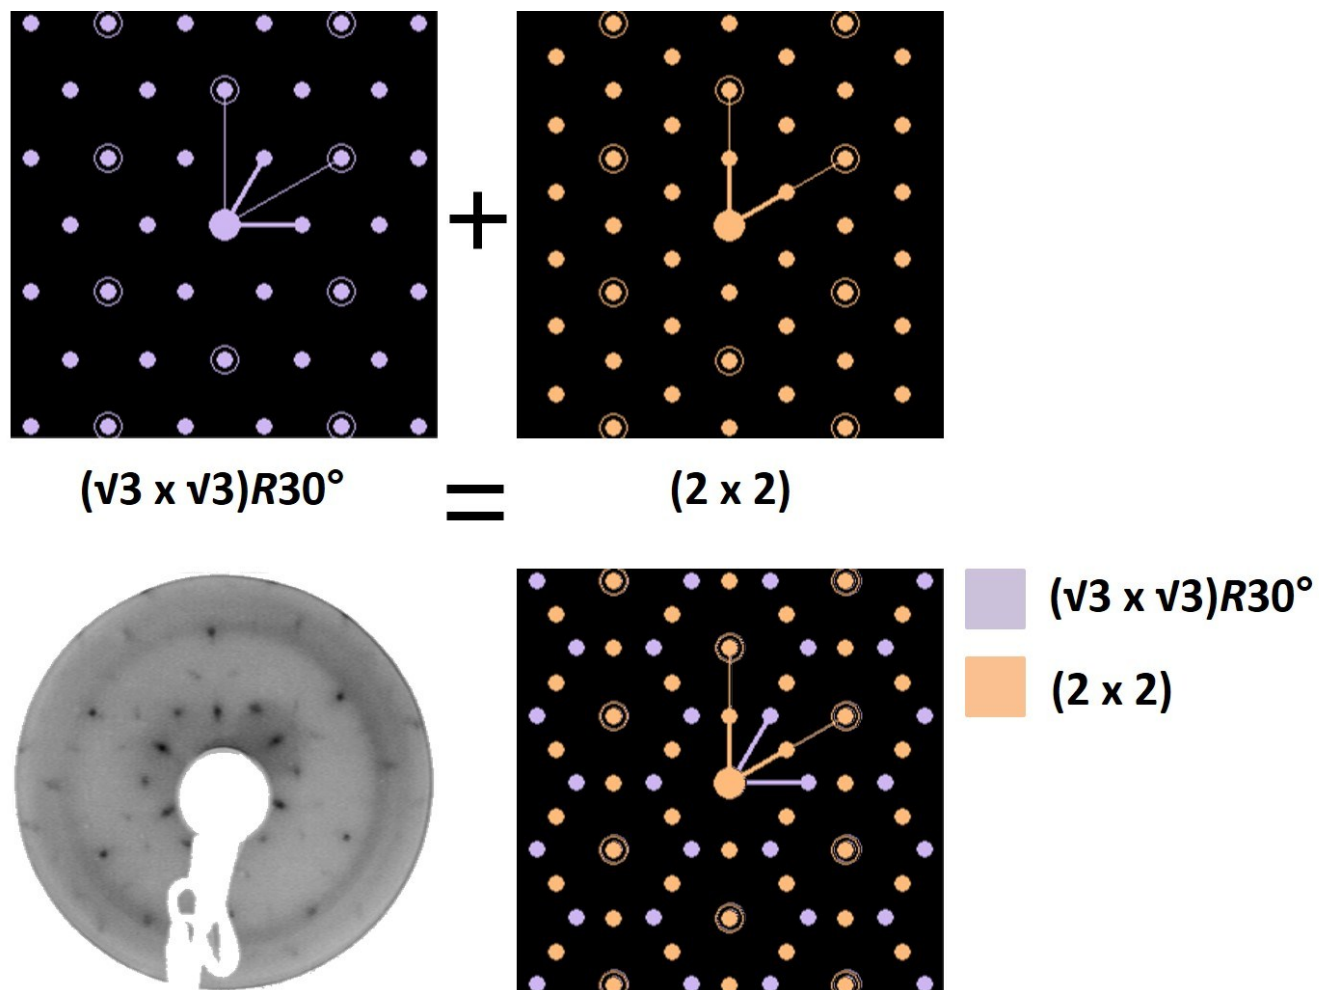

**Figure S2** - Schematic of the two surface reconstructions which when combined make up the surface structure of (0001) Zn-terminated ZnO.

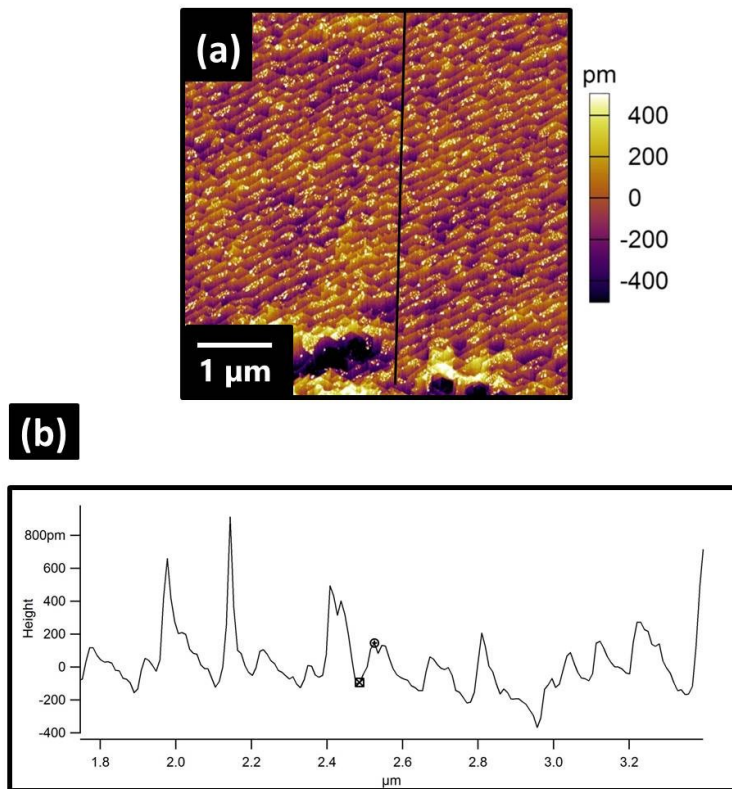

Figure S3 – (a) AFM topography image and (b) corresponding cross-section height profile.
